# Supplementary material for: Deletion of heat shock protein 60 in adult mouse cardiomyocytes perturbs mitochondrial protein homeostasis and causes heart failure
Source: PubMed Central journal article supplement (PMC7205885; doi:10.1038/s41418-019-0374-x), 2019-06-17
Supplement: 41418_2019_374_MOESM1_ESM.pdf [file 41418_2019_374_MOESM1_ESM.pdf]

## Supplemental Figures and Figure Legends

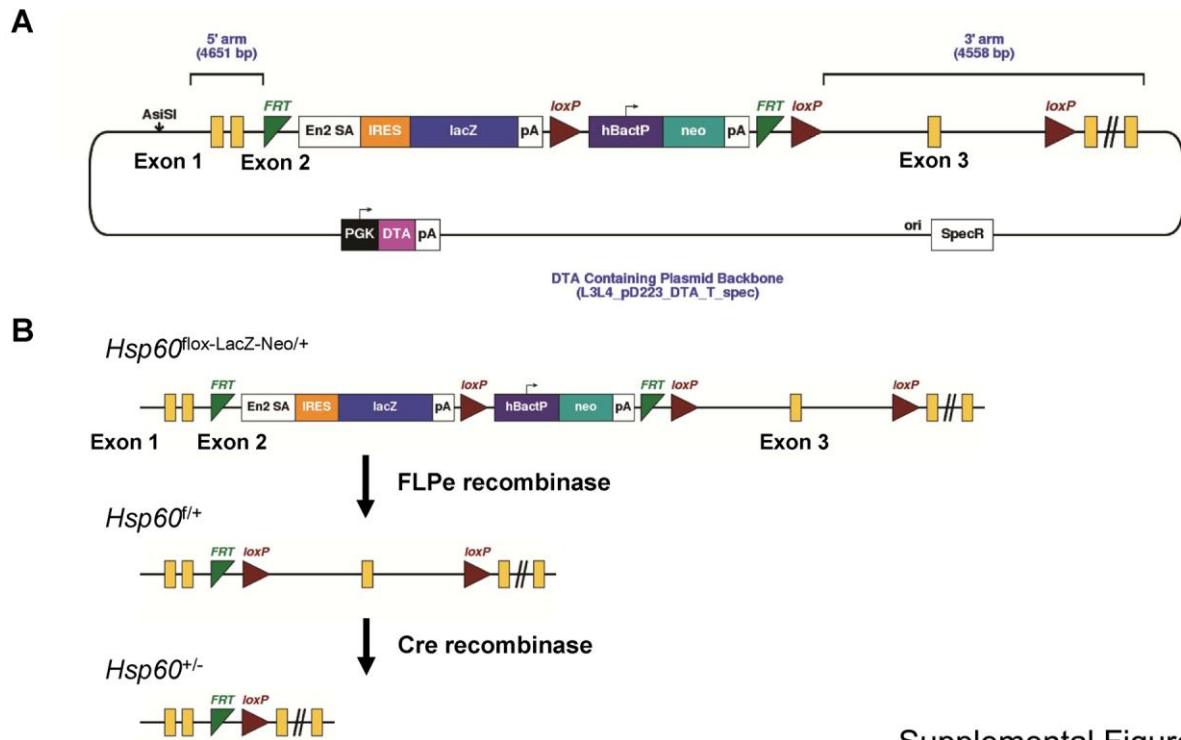

Supplemental Figure 1

**Supplemental Figure 1. Gene targeting strategy for mouse *Hsp60* gene.** (A) Schematic diagram of targeting strategy for mouse *Hsp60* gene provided by the International Knockout Mouse Consortium. The targeting construct was generated by flanking exon 3 of *Hsp60* with loxP sites, while a LacZ-loxP-Neo cassette was flanked by FRT sites. (B) Schematic diagram of mouse crossing strategy to generate heterozygous *Hsp60* floxed and heterozygous *Hsp60* mutant alleles.

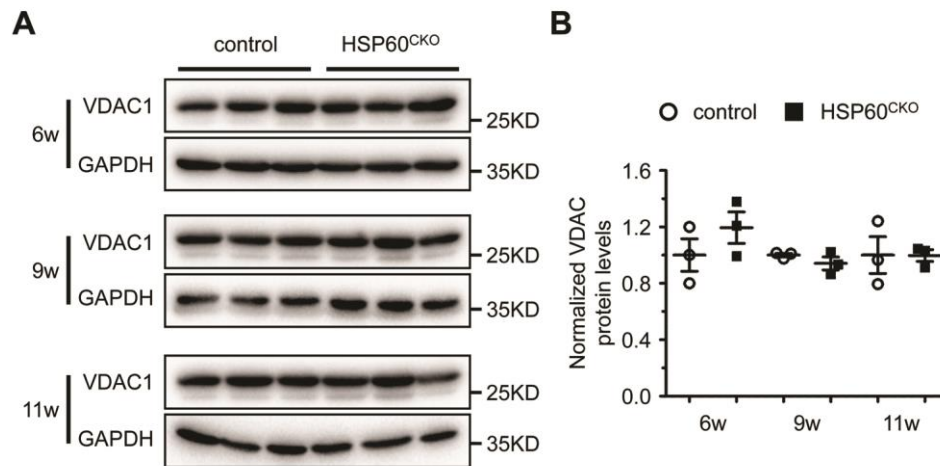

Supplemental Figure 2

**Supplemental Figure 2. Expression of VDAC1 in control and HSP60<sup>CKO</sup> hearts.** (A) Western blot analysis of VDAC1 in control and HSP60<sup>CKO</sup> hearts at 6 weeks (6w), 9 weeks (9w), and 11 weeks (11w) post tamoxifen injection. GAPDH was used as an internal loading control. (B) Quantitative analysis of VDAC1 protein levels. n = 3 mice per group. Data represent mean ± SEM. Significance was determined using the 2-way ANOVA analysis with Bonferroni post-hoc test. No significant difference in VDAC1 protein levels was observed between control and HSP60<sup>CKO</sup> hearts at any stages indicated.

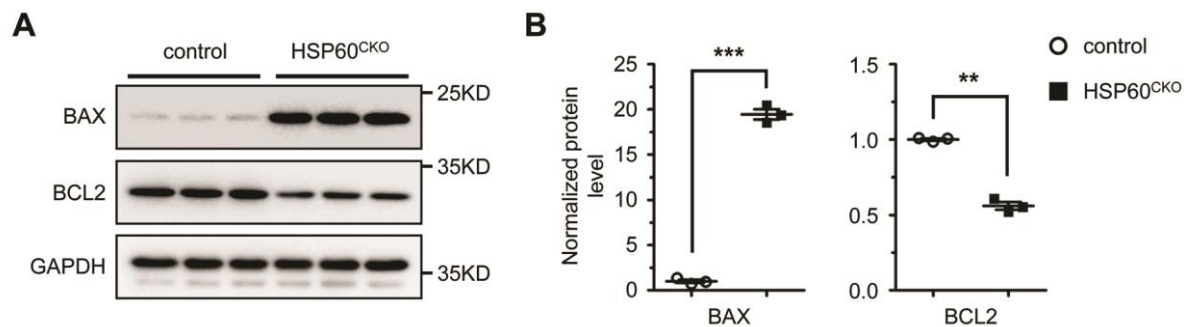

Supplemental Figure 3

**Supplemental Figure 3. Expression of BAX and BCL2 in control and HSP60<sup>CKO</sup> hearts.** (A) Western blot analysis of BAX and BCL2 in control and HSP60<sup>CKO</sup> hearts at 11 weeks post tamoxifen injection. GAPDH was used as an internal loading control. (B) Quantitative analysis of BAX and BCL2 protein levels. n = 3 mice per group. Data represent mean ± SEM. Significance was determined by the 2-tailed, unpaired Student's *t* test. \*\**p* < 0.01, \*\*\**p* < 0.001 versus control.

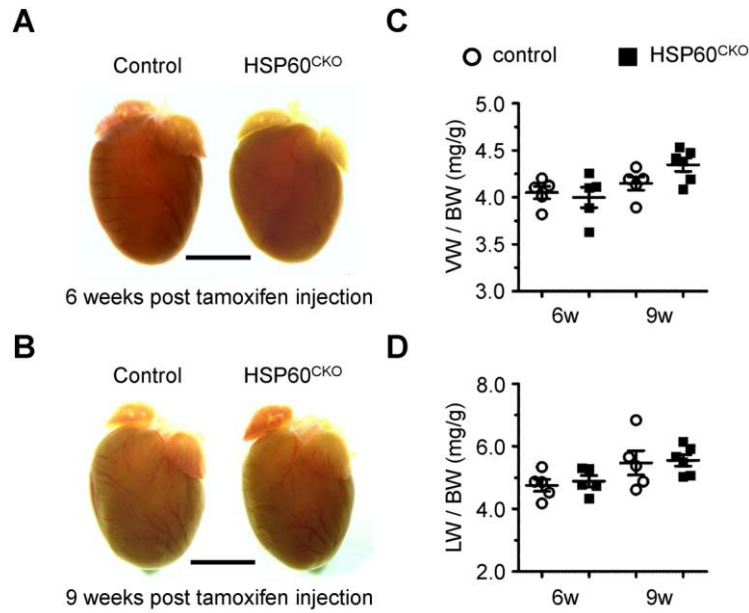

Supplemental Figure 4

**Supplemental Figure 4. Cardiac morphology and mass of HSP60<sup>CKO</sup> mice 6 weeks and 9 weeks post tamoxifen injection.** (A) and (B) Representative hearts of control and HSP60<sup>CKO</sup> mice at 6 weeks (A) and 9 weeks (B) post tamoxifen injection. Scale bar, 3.0 mm. (C) and (D) Ratios of ventricle weight to body weight (VW / BW; C) and lung weight to body weight (LW / BW; D) of control and HSP60<sup>CKO</sup> mice at 6 weeks (6w; n = 5 mice per group) and 9 weeks (9w; n = 5 mice for control group, n = 6 mice for HSP60<sup>CKO</sup> group) post tamoxifen injection. Data represent mean ± SEM. Significance was determined by the 2-tailed, unpaired Student's *t* test.

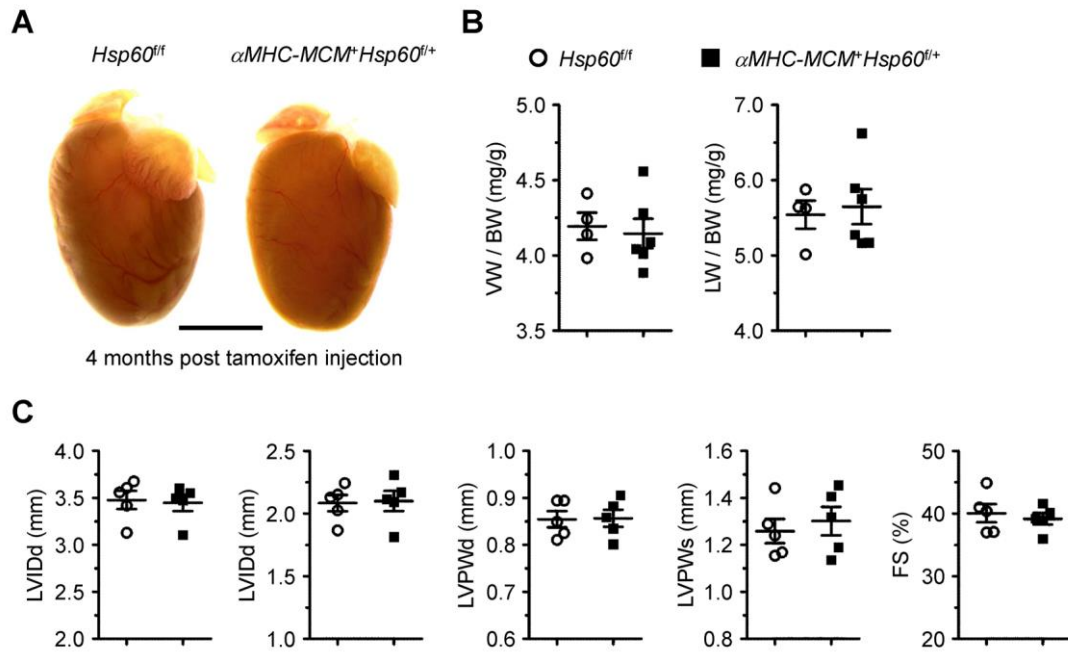

Supplemental Figure 5

**Supplemental Figure 5. Morphological and functional analysis in  $\alpha MHC-MCM^+ HSP60^{fl/+}$  mice 4 months post tamoxifen injection.** Male  $Hsp60^{fl/fl}$  and  $\alpha MHC-MCM^+ HSP60^{fl/+}$  mice aged 7-8 weeks were treated with tamoxifen (20 mg/kg/day, 4 consecutive days) and were assessed with histological and echocardiographic analysis 4 months post tamoxifen injection. **(A)** Representative hearts of  $Hsp60^{fl/fl}$  and  $\alpha MHC-MCM^+ HSP60^{fl/+}$  mice 4 months post tamoxifen injection. Scale bar, 3.0 mm. **(B)** Ratios of ventricle weight to body weight (VW/BW) and lung weight to body weight (LW / BW) of  $Hsp60^{fl/fl}$  (n = 4) and  $\alpha MHC-MCM^+ HSP60^{fl/+}$  (n = 6) mice. Data represent mean  $\pm$  SEM. Significance was determined by the 2-tailed, unpaired Student's *t* test. **(C)** Echocardiographic assessment of cardiac morphology and function. No significant difference in LVIDd, LVIDs, LVPWd, LVPWs, and FS was observed between  $Hsp60^{fl/fl}$  and  $\alpha MHC-MCM^+ HSP60^{fl/+}$  mice 4 months post tamoxifen injection. n = 5 mice per group. Data represent mean  $\pm$  SEM. Significance was determined by the 2-tailed, unpaired Student's *t* test.

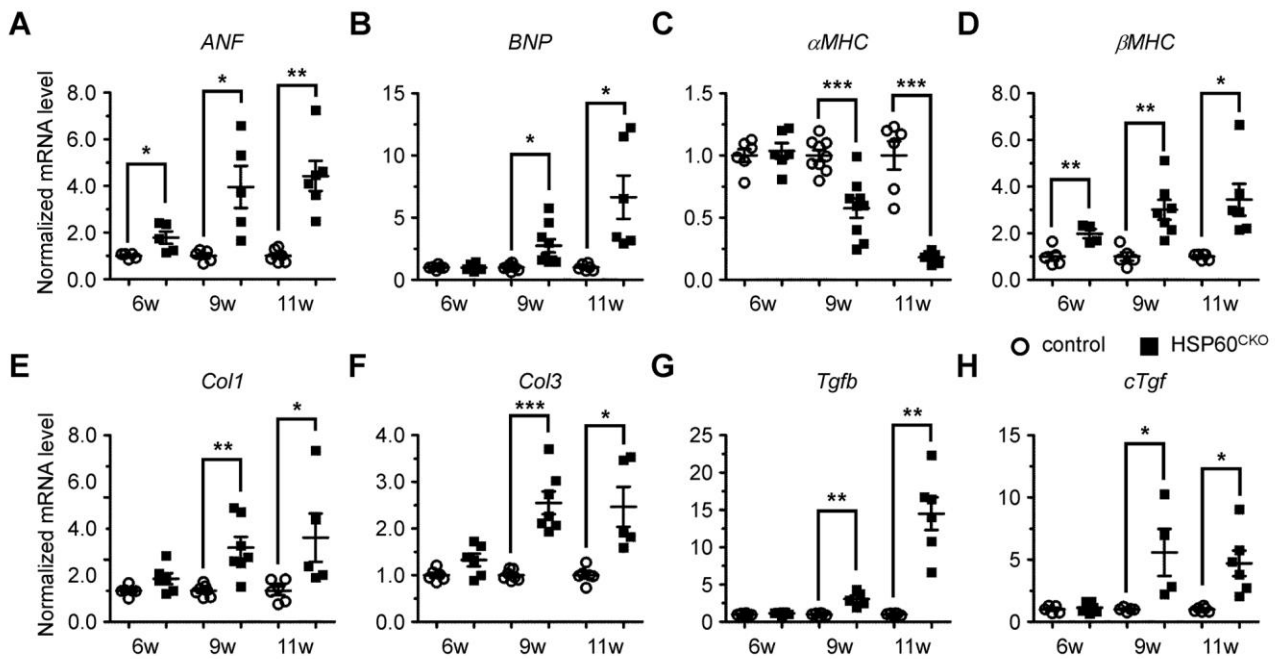

Supplemental Figure 6

**Supplemental Figure 6. Expression of cardiac fetal and pro-fibrotic genes in control and HSP60<sup>CKO</sup> mice.** Quantitative RT-PCR analysis was performed to assess the expression of cardiac fetal genes including *ANF* (A), *BNP* (B), *αMHC* (C), and *βMHC* (D), and pro-fibrotic genes including *Col1* (E), *Col3* (F), *Tgfb* (G), and *cTgf* (H) in control and HSP60<sup>CKO</sup> mice at 6 weeks (6w), 9 weeks (9w), and 11 weeks (11w) post tamoxifen injection. n = 5-7 mice per group. Data represent mean ± SEM. Significance was determined using the 2-way ANOVA analysis with Bonferroni post-hoc test. \*p < 0.05, \*\*p < 0.01, \*\*\*p < 0.001 versus control.

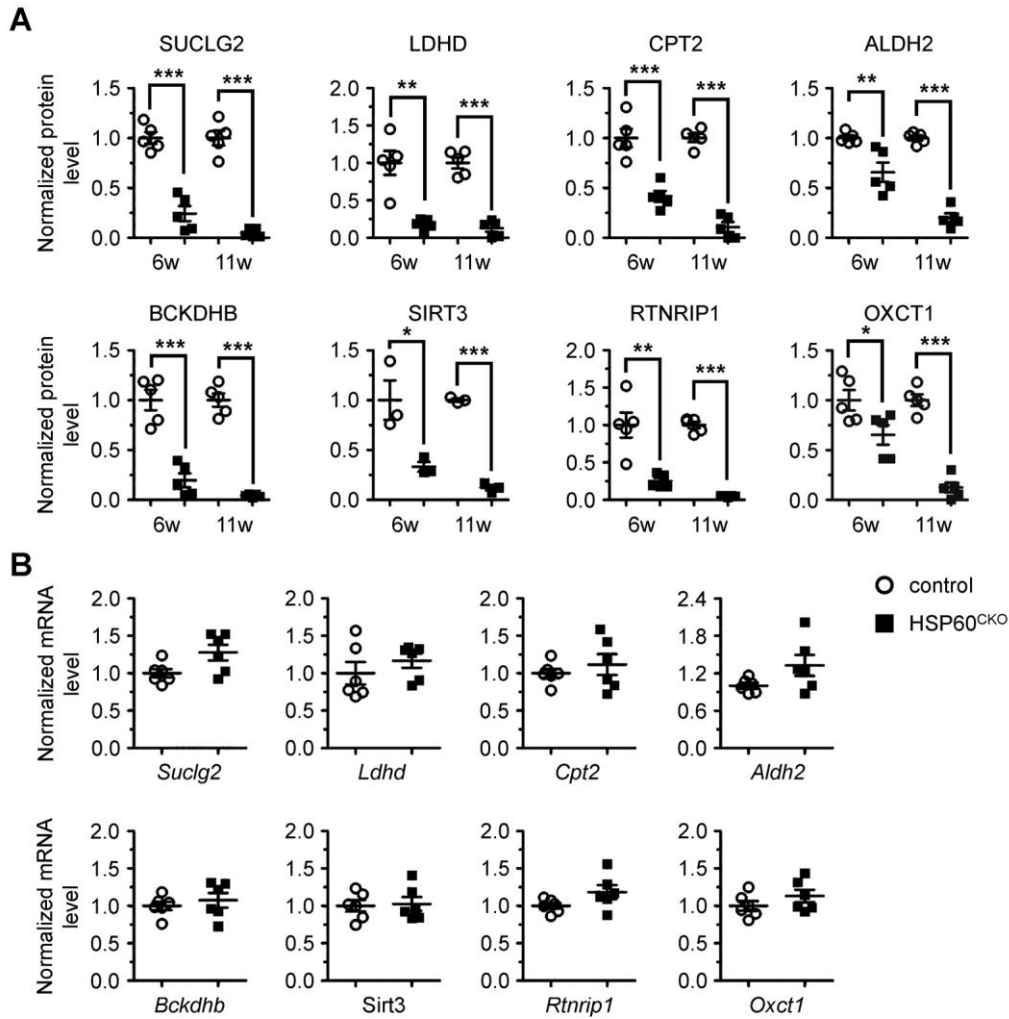

Supplemental Figure 7

**Supplemental Figure 7. Quantitative analysis of protein and mRNA levels of mitochondrial proteins in control and HSP60<sup>CKO</sup> hearts.** (A) Quantitative analysis of changes in protein levels of SUCLG2, LDHD, CPT2, ALDH2, BCKDHB, SIRT3, RTN4IP1, and OXCT1 between control and HSP60<sup>CKO</sup> mitochondria at 6 weeks (6w) and 11 weeks (11w) post tamoxifen injection. n = 3-5 mice per group. Data represent mean  $\pm$  SEM. Significance was determined using the 2-way ANOVA analysis with Bonferroni post-hoc test. \*p < 0.05, \*\*p < 0.01, \*\*\*p < 0.001 versus control. (B) Quantitative RT-PCR analysis of *Suclg2*, *Ldhd*, *Cpt2*, *Aldh2*, *Bckdhb*, *Sirt3*, *Rtn4ip1* and *Oxct1* mRNA levels in control and HSP60<sup>CKO</sup> hearts 6 weeks post tamoxifen injection. n = 6 mice per group. Data represent mean  $\pm$  SEM. Significance was determined by 2-tailed, unpaired Student's *t* test.

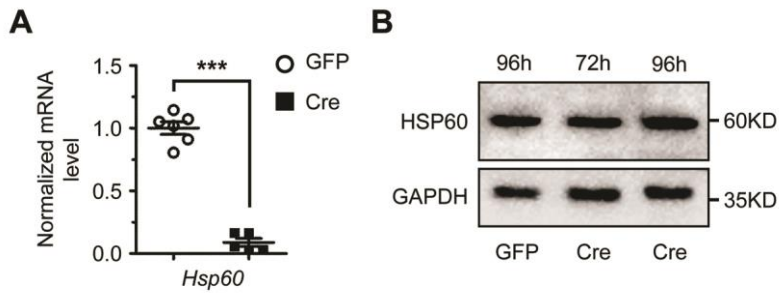

Supplemental Figure 8

**Supplemental Figure 8. Measurement of HSP60 mRNA and protein levels in cultured neonatal mouse cardiomyocytes (NCMs).** NCMs were isolated from neonatal HSP60<sup>fl/fl</sup> mouse hearts, cultured and treated with Adv-GFP and Adv-Cre, respectively. **(A)** Quantitative RT-PCR analysis showing that *Hsp60* mRNA level in cultured HSP60<sup>fl/fl</sup> NCMs treated with Adv-Cre (Cre; n = 5) was dramatically reduced compared with those treated with Adv-GFP (GFP; n = 6) at 72 hours (h) post the addition of adenovirus in the medium. Data represent mean ± SEM. Significance was determined by 2-tailed, unpaired Student's *t* test. \*\*\*p < 0.001 versus GFP. **(B)** Western blot analysis demonstrating that Adv-Cre treatment was not able to decrease HSP60 protein levels in cultured NCMs. Cell lysates were collected from cultured HSP60<sup>fl/fl</sup> NCMs treated with Adv-GFP for 96 hours, and with Adv-Cre for 72 and 96 hours, respectively. GAPDH was used as the protein loading control.

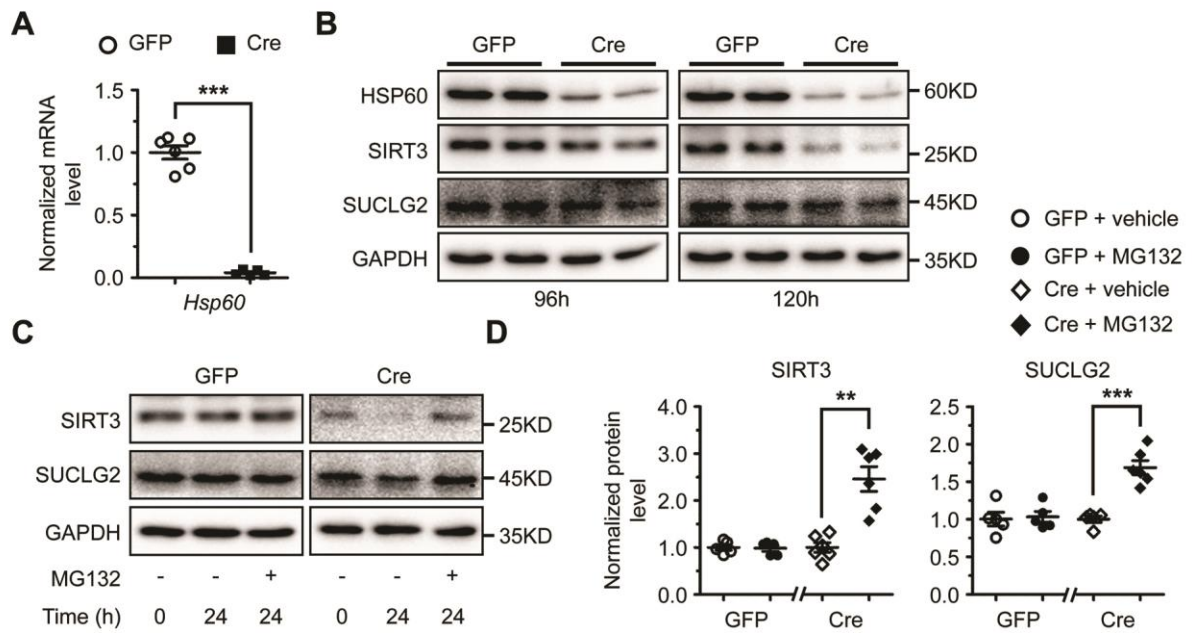

Supplemental Figure 9

**Supplemental Figure 9. MG132 reduced downregulation of mitochondrial proteins by HSP60 deletion in cultured neonatal mouse cardiac fibroblasts (NCFs).** NCFs were isolated from neonatal HSP60<sup>ff</sup> mouse hearts, cultured and treated with Adv-GFP and Adv-Cre, respectively. **(A)** Quantitative RT-PCR analysis of *Hsp60* mRNA levels in cultured HSP60<sup>ff</sup> NCFs that had been treated with Adv-Cre (Cre; n = 5) and Adv-GFP (GFP; n = 6) for 72 hours (h), respectively. Data represent mean  $\pm$  SEM. Significance was determined by 2-tailed, unpaired Student's *t* test. \*\*\**p* < 0.001 versus GFP. **(B)** Western blotting analysis of HSP60, SIRT3, and SUCLG2 in cultured HSP60<sup>ff</sup> NCFs treated with Adv-GFP or Adv-Cre for 96 hours and 120 hours, respectively. GAPDH was used as the protein loading control. **(C)** The effect of MG132 on expression of SIRT3 and SUCLG2 in cultured HSP60<sup>ff</sup> NCFs treated with Adv-GFP or Adv-Cre. Western blotting analysis **(C)** and quantitative analysis **(D)** revealed that addition of MG132 significantly increased protein levels of SIRT3 and SUCLG2 in cultured HSP60<sup>ff</sup> NCFs treated with Adv-Cre. Data represent mean  $\pm$  SEM. Significance was determined by 2-tailed, unpaired Student's *t* test. \*\**p* < 0.01, \*\*\**p* < 0.001 versus vehicle.



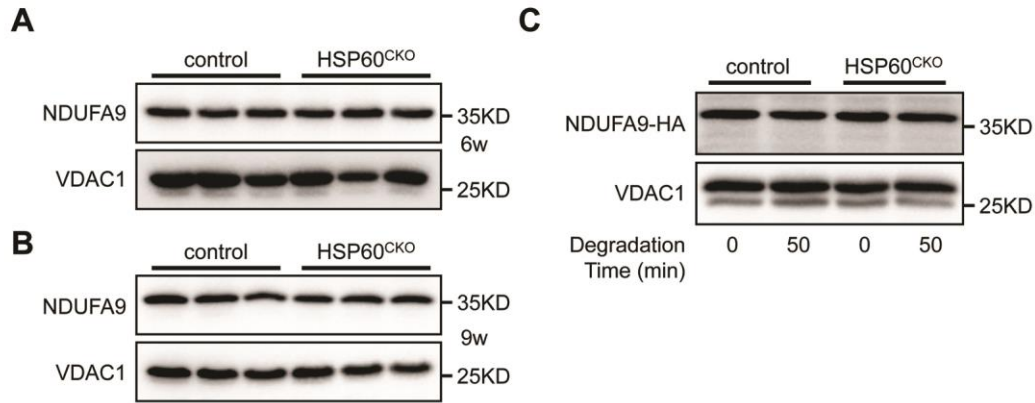

Supplemental Figure 10

**Supplemental Figure 10. Measurement of NDUFA9 protein levels in control and HSP60CKO mitochondria.** (A) and (B) Western blotting analysis of NDUFA9 in mitochondria isolated from control and HSP60<sup>CKO</sup> hearts 6 weeks (6w, A) and 9 weeks (9w, B) post tamoxifen injection, respectively. VDAC1 was used as the protein loading control. (C) Mitochondria were isolated from control and HSP60<sup>CKO</sup> hearts 6 weeks post tamoxifen injection. Import of HA-tagged mouse NDUFA9 pre-protein and subsequent degradation was then assessed by Western blotting analysis, showing comparable protein import and no degradation of NDUFA9 in HSP60<sup>CKO</sup> mitochondria compared with control mitochondria.

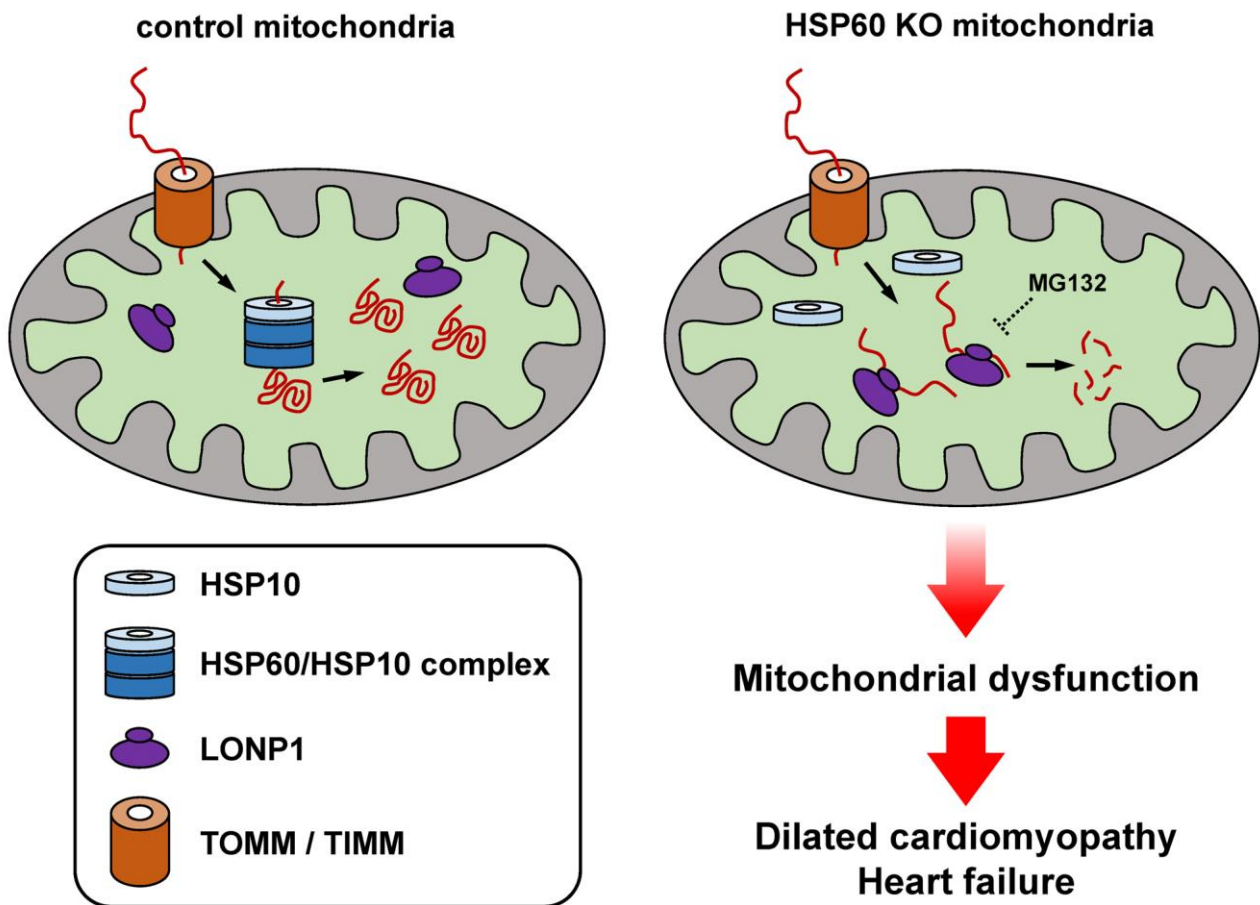

Supplemental Figure 11

**Supplemental Figure 11. Schematic diagram showing the function of mitochondrial HSP60 in adult cardiac cells.** In control mitochondria, nuclear-encoded mitochondrial precursor proteins are maintained in a relatively unfolded state, transported into mitochondria via the narrow pores formed by Translocases of Outer Mitochondrial Membrane (TOMMs) and Translocases of Inner Mitochondrial Membrane (TIMMs). Around 20% of these proteins are folded with assistance of the HSP60/HSP10 complex. In HSP60 knockout (KO) mitochondria, these proteins can be normally imported but are degraded too soon by the LON proteases such as LONP1, which can be blocked by MG132 treatment. Perturbed mitochondrial protein homeostasis in mutant hearts further leads to mitochondrial dysfunction and eventually results in dilated cardiomyopathy and heart failure.

**Supplemental Table 1. Primers utilized for quantitative RT-PCR analyses.**

| Gene name      | Forward primer (5' → 3') | Reverse primer (5' → 3') |
|----------------|--------------------------|--------------------------|
| <i>Hsp60</i>   | AAAGATGGGGTCACTGTTGC     | CATCACACCTCTCCGGATTT     |
| <i>mtHsp70</i> | CTCTGGGAGGGCGTCTTTACC    | CGTTCCCCCTGACACACTTT     |
| <i>Chop</i>    | TCACTACTCTTGACCCTGCG     | ACTGACCACTCTGTTTTCCGT    |
| <i>Suclg2</i>  | GGAGTGAGAGTG CAGAGGTT    | AACACCTCCTTTCAAACCGC     |
| <i>Ldhd</i>    | AACACGGGCATGATGAATCG     | GCTCCGTGATCTGGTCCATA     |
| <i>Cpt2</i>    | CGCCCAGCTTCCATCTTTAC     | CTGCCAGATACCGTAGAGCA     |
| <i>Aldh2</i>   | GCGTGGTCAATATCGTTCCC     | GAAGAACAGGGCAAAGTGGG     |
| <i>Bckdhb</i>  | TTCCATGGCCCAAGAAAAGC     | GGGGTGT CATATCCGCAAAC    |
| <i>Sirt3</i>   | TTTCATGTTGGCCAAGGAGC     | GCTGTTACAAAGGTCCCGTG     |
| <i>Rtnrip1</i> | CTCCTGAACATGGACCGACT     | TTCTGCATCCACCAGTTCT      |
| <i>Oxct1</i>   | ACAATGCAGGGGTTGACAAC     | CCAGAGTCCCATAACCCTGTG    |
| <i>Clpp</i>    | TGCAGTACATCCTGAACCCC     | CTCTGCTTGGTGTGTTTGGC     |
| <i>ANP</i>     | TCGTCTTGGCCTTTTGGCT      | TCCAGGTGGTCTAGCAGTTCT    |
| <i>BNP</i>     | AAGCTGCTGGAGCTGATAAGA    | GTTACAGCCCAAACGACTGAC    |
| <i>αMHC</i>    | TGAAAACGGAAAGACGGTGA     | TCCTTGAGGTTGTACAGCACA    |
| <i>βMHC</i>    | CTACAGGCCTGGGCTTACCT     | TCTCCTTCTAGACTTCCGC      |
| <i>Col1</i>    | TTCACCTACAGCACCTTGT      | GGTGGAGGGAGTTTACACGA     |
| <i>Col3</i>    | CAACCAGTGCAAGTGACCAA     | GCACCATTGAGACATTTTGAAG   |
| <i>Tgfb</i>    | ACTGGAGTTGTACGGCAGTG     | GGATCCACTTCCAACCCAGG     |
| <i>cTgf</i>    | GCATCTCCACCCGAGTTACC     | AACTTGACAGGCTTGGCGAT     |
| <i>Gapdh</i>   | ATGACTCCACTCACGGCAAAT    | TCCCATTCTCGGCCTTGAC      |
|                |                          |                          |
|                |                          |                          |

**Supplemental Table 2. Antibodies utilized for Western blotting analysis.**

| Protein name | Vendor                    | Catalog no     |
|--------------|---------------------------|----------------|
| HSP60        | Santa Cruz Biotechnology  | Sc-13966       |
| GAPDH        | Santa Cruz Biotechnology  | Sc-32233       |
| VDAC1        | Sangon Biotech            | D151112-0200   |
| NDUFA9       | Mito Science              | MS111-SP/E0699 |
| CLPP         | Santa Cruz Biotechnology  | Sc-47846       |
| LONP1        | Abcam                     | Ab103809       |
| HTRA2        | Santa Cruz Biotechnology  | Sc-15467       |
| SUCLG2       | Santa Cruz Biotechnology  | Sc-390818      |
| LDHD         | Santa Cruz Biotechnology  | Sc-134673      |
| CPT2         | Pierce                    | PA5-12217      |
| ALDH2        | Santa Cruz Biotechnology  | Sc-48837       |
| BCKDHB       | Santa Cruz Biotechnology  | Sc-374630      |
| SIRT3        | Cell Signaling Technology | D22A3          |
| RTN4IP1      | Santa Cruz Biotechnology  | Sc-514049      |
| OXCT1        | Santa Cruz Biotechnology  | Sc-133988      |
| BAX          | Cell Signaling Technology | 2772S          |
| BCL2         | Abgent                    | AP1303A        |

**Supplemental Table 3. Mitochondrial ETC components identified by proteomic analysis in control and HSP60<sup>CKO</sup> hearts.**

| Protein Accession | Protein description                                                          | Symbol        | Complex  | KO/Ct Ratio  | P value            | MW [Da]      | pI          | AASC [%]    | MP       | Score      |
|-------------------|------------------------------------------------------------------------------|---------------|----------|--------------|--------------------|--------------|-------------|-------------|----------|------------|
| O35683            | NADH dehydrogenase [ubiquinone] 1 alpha subcomplex subunit 1                 | Ndufa1        | I        | 0.731        | 0.169704193        | 9336         | 9.52        | 22.9        | 2        | 65         |
| <b>P03888</b>     | <b>NADH-ubiquinone oxidoreductase chain 1</b>                                | <b>mt-Nd1</b> | <b>I</b> | <b>0.587</b> | <b>0.00016967</b>  | <b>37696</b> | <b>6.42</b> | <b>8.8</b>  | <b>3</b> | <b>107</b> |
| P03893            | NADH-ubiquinone oxidoreductase chain 2                                       | mt-Nd2        | I        | 0.838        | 0.402999597        | 41991        | 9.93        | 2           | 1        | 25         |
| <b>P03899</b>     | <b>NADH-ubiquinone oxidoreductase chain 3</b>                                | <b>mt-Nd3</b> | <b>I</b> | <b>0.479</b> | <b>0.988874922</b> | <b>14413</b> | <b>4.71</b> | <b>18.3</b> | <b>2</b> | <b>86</b>  |
| P03911            | NADH-ubiquinone oxidoreductase chain 4                                       | mt-Nd4        | I        | 0.917        | 0.260293171        | 55455        | 9.42        | 7.2         | 3        | 130        |
| <b>P03921</b>     | <b>NADH-ubiquinone oxidoreductase chain 5</b>                                | <b>mt-Nd5</b> | <b>I</b> | <b>0.669</b> | <b>0.144453636</b> | <b>74271</b> | <b>9.15</b> | <b>4.6</b>  | <b>2</b> | <b>183</b> |
| P52503            | NADH dehydrogenase [ubiquinone] iron-sulfur protein 6, mitochondrial         | Ndufs6        | I        | 0.837        | 5.61168E-05        | 15016        | 8.87        | 60.3        | 6        | 555        |
| Q3UIU2            | NADH dehydrogenase [ubiquinone] 1 beta subcomplex subunit 6                  | Ndufb6        | I        | 0.747        | 4.16405E-05        | 17338        | 9.79        | 35.9        | 6        | 293        |
| <b>Q8BK30</b>     | <b>NADH dehydrogenase [ubiquinone] flavoprotein 3, mitochondrial</b>         | <b>Ndufv3</b> | <b>I</b> | <b>0.653</b> | <b>3.46671E-05</b> | <b>13869</b> | <b>9.34</b> | <b>21.2</b> | <b>2</b> | <b>152</b> |
| Q8K3J1            | NADH dehydrogenase [ubiquinone] iron-sulfur protein 8, mitochondrial         | Ndufs8        | I        | 0.684        | 0                  | 27000        | 5.89        | 37.3        | 10       | 685        |
| Q91VD9            | NADH-ubiquinone oxidoreductase 75 kDa subunit, mitochondrial                 | Ndufs1        | I        | 0.735        | 3.24901E-12        | 89918        | 5.51        | 62.4        | 38       | 3152       |
| Q91WD5            | NADH dehydrogenase [ubiquinone] iron-sulfur protein 2, mitochondrial         | Ndufs2        | I        | 0.751        | 2.50496E-09        | 58262        | 6.52        | 59.6        | 21       | 1125       |
| Q91YT0            | NADH dehydrogenase [ubiquinone] flavoprotein 1, mitochondrial                | Ndufv1        | I        | 0.684        | 3.24896E-12        | 57673        | 8.51        | 50.6        | 21       | 1289       |
| Q99LC3            | NADH dehydrogenase [ubiquinone] 1 alpha subcomplex subunit 10, mitochondrial | Ndufa10       | I        | 0.683        | 3.24907E-12        | 47050        | 7.63        | 39.2        | 16       | 1130       |

|               |                                                                             |                |          |              |                    |              |              |             |          |            |
|---------------|-----------------------------------------------------------------------------|----------------|----------|--------------|--------------------|--------------|--------------|-------------|----------|------------|
| Q99LY9        | NADH dehydrogenase [ubiquinone] iron-sulfur protein 5                       | Pex19          | I        | 0.769        | 2.30643E-11        | 16076        | 9.1          | 70.8        | 8        | 409        |
| Q9CPP6        | NADH dehydrogenase [ubiquinone] 1 alpha subcomplex subunit 5                | Ndufa5         | I        | 0.713        | 0.012538119        | 17075        | 7.82         | 59.5        | 8        | 375        |
| Q9CQ54        | NADH dehydrogenase [ubiquinone] 1 subunit C2                                | Ndufc2         | I        | 0.711        | 1.50525E-06        | 16274        | 9.24         | 47.5        | 8        | 506        |
| <b>Q9CQ75</b> | <b>NADH dehydrogenase [ubiquinone] 1 alpha subcomplex subunit 2</b>         | <b>Ndufa2</b>  | <b>I</b> | <b>0.61</b>  | <b>7.39376E-06</b> | <b>12627</b> | <b>10.02</b> | <b>63.6</b> | <b>8</b> | <b>418</b> |
| Q9CQ91        | NADH dehydrogenase [ubiquinone] 1 alpha subcomplex subunit 3                | Ndufa3         | I        | 0.817        | 0.001677443        | 10700        | 8.04         | 28.6        | 3        | 89         |
| Q9CQC7        | NADH dehydrogenase [ubiquinone] 1 beta subcomplex subunit 4                 | Ndufb4         | I        | 0.826        | 0.008397679        | 17364        | 9.89         | 55          | 6        | 353        |
| Q9CQH3        | NADH dehydrogenase [ubiquinone] 1 beta subcomplex subunit 5, mitochondrial  | Ndufb5         | I        | 0.731        | 4.55413E-10        | 24503        | 9.43         | 21.2        | 4        | 294        |
| Q9CQJ8        | NADH dehydrogenase [ubiquinone] 1 beta subcomplex subunit 9                 | Ndufb9         | I        | 0.774        | 4.23551E-05        | 25005        | 7.67         | 48          | 7        | 455        |
| <b>Q9CQZ5</b> | <b>NADH dehydrogenase [ubiquinone] 1 alpha subcomplex subunit 6</b>         | <b>Ndufa6</b>  | <b>I</b> | <b>0.565</b> | <b>4.72108E-06</b> | <b>18023</b> | <b>10.1</b>  | <b>46.6</b> | <b>9</b> | <b>411</b> |
| <b>Q9CQZ6</b> | <b>NADH dehydrogenase [ubiquinone] 1 beta subcomplex subunit 3</b>          | <b>Ndufb3</b>  | <b>I</b> | <b>0.647</b> | <b>1.96349E-09</b> | <b>13747</b> | <b>9.01</b>  | <b>17.3</b> | <b>2</b> | <b>95</b>  |
| <b>Q9CR21</b> | <b>Acyl carrier protein, mitochondrial</b>                                  | <b>Ndufab1</b> | <b>I</b> | <b>0.636</b> | <b>0.000412077</b> | <b>19707</b> | <b>5.08</b>  | <b>19.2</b> | <b>3</b> | <b>90</b>  |
| Q9CR61        | NADH dehydrogenase [ubiquinone] 1 beta subcomplex subunit 7                 | Ndufb7         | I        | 0.718        | 2.59799E-06        | 19069        | 8.35         | 71.5        | 8        | 840        |
| <b>Q9CXZ1</b> | <b>NADH dehydrogenase [ubiquinone] iron-sulfur protein 4, mitochondrial</b> | <b>Ndufs4</b>  | <b>I</b> | <b>0.591</b> | <b>2.69329E-12</b> | <b>23725</b> | <b>10</b>    | <b>40.6</b> | <b>7</b> | <b>538</b> |
| Q9D6J5        | NADH dehydrogenase [ubiquinone] 1 beta subcomplex subunit 8, mitochondrial  | Ndufb8         | I        | 0.744        | 0.162030894        | 23523        | 6.15         | 29.6        | 4        | 500        |
| Q9D6J6        | NADH dehydrogenase [ubiquinone] flavoprotein 2, mitochondrial               | Ndufv2         | I        | 0.775        | 1.23712E-12        | 31047        | 7            | 42.3        | 9        | 990        |

|               |                                                                                |               |          |              |                    |              |              |             |          |            |
|---------------|--------------------------------------------------------------------------------|---------------|----------|--------------|--------------------|--------------|--------------|-------------|----------|------------|
| Q9DC69        | NADH dehydrogenase [ubiquinone] 1 alpha subcomplex subunit 9, mitochondrial    | Ndufa9        | I        | 0.706        | 8.10463E-15        | 47425        | 9.75         | 35          | 14       | 496        |
| Q9DC70        | NADH dehydrogenase [ubiquinone] iron-sulfur protein 7, mitochondrial           | Ndufs7        | I        | 0.765        | 1.98014E-05        | 27244        | 9.94         | 29.5        | 9        | 361        |
| Q9DCJ5        | NADH dehydrogenase [ubiquinone] 1 alpha subcomplex subunit 8                   | Ndufa8        | I        | 0.671        | 3.24907E-12        | 24331        | 8.76         | 46.5        | 8        | 662        |
| Q9DCS9        | NADH dehydrogenase [ubiquinone] 1 beta subcomplex subunit 10                   | Ndufb10       | I        | 0.827        | 0.000360115        | 24504        | 8.19         | 43.8        | 8        | 414        |
| Q9DCT2        | NADH dehydrogenase [ubiquinone] iron-sulfur protein 3, mitochondrial           | Ndufs3        | I        | 0.716        | 3.25417E-12        | 33281        | 6.67         | 38.8        | 11       | 929        |
| <b>Q9Z1P6</b> | <b>NADH dehydrogenase [ubiquinone] 1 alpha subcomplex subunit 7</b>            | <b>Ndufa7</b> | <b>I</b> | <b>0.651</b> | <b>9.99484E-12</b> | <b>15375</b> | <b>10.17</b> | <b>60.2</b> | <b>8</b> | <b>654</b> |
| Q8K2B3        | Succinate dehydrogenase [ubiquinone] flavoprotein subunit, mitochondrial       | Sdha          | II       | 0.802        | 3.24907E-12        | 80956        | 7.06         | 44.9        | 27       | 2821       |
| Q9CQA3        | Succinate dehydrogenase [ubiquinone] iron-sulfur subunit, mitochondrial        | Sdhb          | II       | 0.824        | 2.10942E-15        | 38549        | 8.96         | 48.6        | 15       | 1068       |
| Q9CXV1        | Succinate dehydrogenase [ubiquinone] cytochrome b small subunit, mitochondrial | Sdhd          | II       | 0.736        | 0.028917358        | 18434        | 9.3          | 4.4         | 1        | 36         |
| Q9CZB0        | Succinate dehydrogenase cytochrome b560 subunit, mitochondrial                 | Sdhc          | II       | 0.951        | 0.552220466        | 20431        | 9.97         | 18.3        | 3        | 92         |
| P00158        | Cytochrome b                                                                   | mt-Cytb       | III      | 0.758        | 0.012976045        | 45873        | 7.79         | 4.2         | 3        | 48         |
| P99028        | Cytochrome b-c1 complex subunit 6, mitochondrial                               | Wbp11         | III      | 0.712        | 3.97155E-08        | 12546        | 4.81         | 74.2        | 7        | 393        |
| Q8R111        | Cytochrome b-c1 complex subunit 9                                              | Uqcr10        | III      | 0.83         | 0.000231985        | 8816         | 9.16         | 26.6        | 1        | 537        |
| Q9CQ69        | Cytochrome b-c1 complex subunit 8                                              | Uqcrq         | III      | 0.838        | 0.000185529        | 10908        | 10.26        | 58.5        | 8        | 284        |
| Q9CR68        | Cytochrome b-c1 complex subunit Rieske, mitochondrial                          | Uqcrfs1       | III      | 0.767        | 3.90588E-06        | 33530        | 8.91         | 48.5        | 13       | 1955       |
| Q9CZ13        | Cytochrome b-c1 complex subunit 1, mitochondrial                               | Uqcrc1        | III      | 0.819        | 3.92479E-10        | 56654        | 5.81         | 33.1        | 14       | 3291       |

|        |                                                         |         |     |       |             |       |       |      |    |       |
|--------|---------------------------------------------------------|---------|-----|-------|-------------|-------|-------|------|----|-------|
| Q9D855 | Cytochrome b-c1 complex subunit 7                       | Uqcrb   | III | 0.777 | 2.38179E-08 | 16498 | 9.1   | 64.9 | 10 | 638   |
| Q9DB77 | Cytochrome b-c1 complex subunit 2, mitochondrial        | Uqcrc2  | III | 0.755 | 0           | 54679 | 9.26  | 45.7 | 18 | 3542  |
| Q62425 | Cytochrome c oxidase subunit NDUFA4                     | Ndufa4  | IV  | 0.811 | 0.001532783 | 11383 | 9.52  | 62.2 | 7  | 312   |
| P00405 | Cytochrome c oxidase subunit 2                          | mt-Co2  | IV  | 0.814 | 5.70888E-08 | 27505 | 4.6   | 35.2 | 7  | 855   |
| P12787 | Cytochrome c oxidase subunit 5A, mitochondrial          | Cox5a   | IV  | 0.777 | 3.24923E-12 | 18153 | 6.08  | 54.1 | 8  | 981   |
| P17665 | Cytochrome c oxidase subunit 7C, mitochondrial          | Cox7c   | IV  | 0.827 | 2.42036E-05 | 8474  | 11    | 36.5 | 3  | 600   |
| P19536 | Cytochrome c oxidase subunit 5B, mitochondrial          | Cox5b   | IV  | 0.827 | 5.98399E-08 | 15693 | 8.69  | 61.7 | 7  | 1346  |
| P19783 | Cytochrome c oxidase subunit 4 isoform 1, mitochondrial | Cox4i1  | IV  | 0.817 | 3.24901E-12 | 23241 | 9.25  | 65.7 | 11 | 1746  |
| P43023 | Cytochrome c oxidase subunit 6A2, mitochondrial         | Cox6a2  | IV  | 0.765 | 5.26935E-06 | 11773 | 9.24  | 42.3 | 2  | 705   |
| P43024 | Cytochrome c oxidase subunit 6A1, mitochondrial         | Cox6a1  | IV  | 1.057 | 0.5825712   | 13261 | 9.97  | 14.4 | 1  | 23    |
| P48771 | Cytochrome c oxidase subunit 7A2, mitochondrial         | Cox7a2  | IV  | 0.932 | 0.438656918 | 10889 | 10.28 | 27.7 | 2  | 107   |
| P56391 | Cytochrome c oxidase subunit 6B1                        | Cox6b1  | IV  | 0.764 | 1.11022E-16 | 12585 | 8.96  | 70.9 | 7  | 743   |
| P56392 | Cytochrome c oxidase subunit 7A1, mitochondrial         | Cox7a1  | IV  | 0.794 | 2.13653E-07 | 10470 | 9.83  | 28.8 | 2  | 471   |
| P56393 | Cytochrome c oxidase subunit 7B, mitochondrial          | Cox7b   | IV  | 0.872 | 0.021109888 | 10209 | 10.28 | 10   | 2  | 43    |
| Q9CPQ1 | Cytochrome c oxidase subunit 6C                         | Sf1     | IV  | 0.698 | 6.30687E-06 | 10526 | 10.13 | 61.8 | 8  | 234   |
| P00848 | ATP synthase subunit a                                  | mt-Atp6 | V   | 1.169 | 0.586030407 | 26683 | 10.44 | 4    | 1  | 30    |
| P03930 | ATP synthase protein 8                                  | mt-Atp8 | V   | 0.988 | 0.458700438 | 9365  | 9.88  | 52.2 | 4  | 112   |
| P56135 | ATP synthase subunit f, mitochondrial                   | Atp5j2  | V   | 0.89  | 0.000112155 | 12686 | 9.95  | 34.1 | 3  | 492   |
| P56382 | ATP synthase subunit epsilon, mitochondrial             | Atp5e   | V   | 0.801 | 0.021507931 | 7954  | 10.01 | 44.2 | 3  | 65    |
| P56383 | ATP synthase F(0) complex subunit C2, mitochondrial     | Atp5g2  | V   | 0.879 | 0.006853877 | 16726 | 10.36 | 4.8  | 1  | 141   |
| P56480 | ATP synthase subunit beta, mitochondrial                | Atp5b   | V   | 0.881 | 2.68687E-11 | 61765 | 5.19  | 68.6 | 27 | 12728 |
| P97450 | ATP synthase-coupling factor 6, mitochondrial           | Atp5j   | V   | 0.766 | 0.000181739 | 15468 | 9.36  | 46.3 | 5  | 494   |



|        |                                                     |        |   |       |             |       |      |      |    |       |
|--------|-----------------------------------------------------|--------|---|-------|-------------|-------|------|------|----|-------|
| Q03265 | ATP synthase subunit alpha, mitochondrial           | Atp5a1 | V | 0.868 | 0           | 67163 | 9.22 | 68.4 | 35 | 13692 |
| Q06185 | ATP synthase subunit e, mitochondrial               | Hrk    | V | 0.822 | 1.32527E-08 | 10064 | 9.34 | 62   | 5  | 1155  |
| Q91VR2 | ATP synthase subunit gamma, mitochondrial           | Atp5c1 | V | 0.892 | 2.78942E-08 | 39396 | 9.06 | 40.6 | 12 | 1378  |
| Q9CPQ8 | ATP synthase subunit g, mitochondrial               | Atp5l  | V | 0.86  | 3.27027E-05 | 13938 | 9.74 | 60.2 | 7  | 436   |
| Q9CQQ7 | ATP synthase F(0) complex subunit B1, mitochondrial | Atp5f1 | V | 0.905 | 1.78436E-07 | 34544 | 9.11 | 37.1 | 13 | 1268  |
| Q9CRA7 | ATP synthase subunit s, mitochondrial               | Atp5s  | V | 0.729 | 0.020368047 | 27669 | 8.33 | 14   | 3  | 68    |
| Q9D3D9 | ATP synthase subunit delta, mitochondrial           | Atp5d  | V | 0.871 | 0.026334622 | 18735 | 5.03 | 41.1 | 4  | 2376  |
| Q9DB20 | ATP synthase subunit O, mitochondrial               | Atp5o  | V | 0.77  | 3.26728E-12 | 28447 | 10   | 55.4 | 10 | 1338  |
| Q9DCX2 | ATP synthase subunit d, mitochondrial               | Hoxc9  | V | 0.9   | 0.02991593  | 23149 | 5.52 | 71.4 | 13 | 1084  |

**Supplemental Table 4. Downregulated and upregulated mitochondrial proteins in HSP60<sup>CKO</sup> hearts.**

| Protein Accession | Protein description                                             | Symbol  | KO/Ct Ratio | P value     | MW [Da] | pI   | AASC [%] | MP | Score |
|-------------------|-----------------------------------------------------------------|---------|-------------|-------------|---------|------|----------|----|-------|
| Q9Z2I8            | Succinyl-CoA ligase [GDP-forming] subunit beta, mitochondrial   | SucIlg2 | 0.228       | 3.2491E-12  | 55346   | 6.58 | 32.6     | 14 | 719   |
| Q7TNG8            | Probable D-lactate dehydrogenase, mitochondrial                 | Ldhd    | 0.268       | 0.00384888  | 55937   | 6.15 | 6.2      | 3  | 55    |
| Q8R3F5            | Malonyl-CoA-acyl carrier protein transacylase, mitochondrial    | Mcat    | 0.275       | 0.009225728 | 46252   | 8.42 | 3.7      | 1  | 101   |
| P63038            | 60 kDa heat shock protein, mitochondrial                        | Hspd1   | 0.278       | 0           | 73692   | 5.91 | 63.7     | 32 | 2204  |
| Q99J25            | rRNA methyltransferase 1, mitochondrial                         | Mrm1    | 0.29        |             | 37225   | 9.17 | 7.2      | 2  | 70    |
| Q91WM2            | Cat eye syndrome critical region protein 5 homolog              | Hdhd5   | 0.294       | 0.042559176 | 49770   | 7.75 | 7.6      | 3  | 69    |
| Q9CR24            | Nucleoside diphosphate-linked moiety X motif 8, mitochondrial   | Nudt8   | 0.315       | 0.02182006  | 24841   | 6.06 | 30       | 4  | 181   |
| P52825            | Carnitine O-palmitoyltransferase 2, mitochondrial               | Cpt2    | 0.329       | 0           | 83670   | 8.59 | 24.6     | 16 | 1031  |
| Q8R4N0            | Citrate lyase subunit beta-like protein, mitochondrial          | Clybl   | 0.361       | 4.56665E-12 | 44283   | 8.76 | 46.7     | 15 | 489   |
| Q924D0            | Reticulon-4-interacting protein 1, mitochondrial                | Rtn4ip1 | 0.379       | 0.000230668 | 50331   | 9.29 | 23.5     | 8  | 240   |
| Q6P3A8            | 2-oxoisovalerate dehydrogenase subunit beta, mitochondrial      | Bckdhb  | 0.389       | 5.09247E-12 | 47776   | 6.27 | 21.5     | 7  | 299   |
| P47738            | Aldehyde dehydrogenase, mitochondrial                           | Aldh2   | 0.398       | 4.12842E-12 | 64119   | 7.53 | 34.1     | 16 | 504   |
| Q9D7B6            | Isobutyryl-CoA dehydrogenase, mitochondrial                     | Acad8   | 0.399       | 2.64632E-05 | 50830   | 8.46 | 26.4     | 10 | 332   |
| Q9CXI0            | 2-methoxy-6-polyprenyl-1,4-benzoquinol methylase, mitochondrial | Coq5    | 0.4         | 0.002747672 | 41836   | 7.14 | 18       | 4  | 223   |
| P85094            | Isochorismatase domain-containing protein 2A, mitochondrial     | Isoc2a  | 0.401       | 0.004712191 | 24578   | 8.25 | 44.7     | 6  | 161   |
| Q8CH40            | Nucleoside diphosphate-linked moiety X motif 6                  | Nudt6   | 0.406       | 0.003455679 | 38267   | 9.26 | 10.9     | 3  | 85    |
| Q8BXN7            | Protein phosphatase 1K, mitochondrial                           | Ppm1k   | 0.414       | 0.132321732 | 46620   | 5.96 | 8.6      | 2  | 51    |
| Q9CWG8            | NADH dehydrogenase [ubiquinone] complex I, assembly factor 7    | Ndufaf7 | 0.421       | 0.004100258 | 54482   | 6.47 | 10.6     | 4  | 70    |

|        |                                                                                |         |       |             |       |      |      |    |      |
|--------|--------------------------------------------------------------------------------|---------|-------|-------------|-------|------|------|----|------|
| Q8R104 | NAD-dependent protein deacetylase sirtuin-3                                    | Sirt3   | 0.431 | 0.035495868 | 39454 | 7.05 | 11.4 | 4  | 142  |
| Q9D6R2 | Isocitrate dehydrogenase [NAD] subunit alpha, mitochondrial                    | Idh3a   | 0.436 | 0           | 46027 | 6.27 | 43.7 | 16 | 833  |
| P70404 | Isocitrate dehydrogenase [NAD] subunit gamma 1, mitochondrial                  | Idh3g   | 0.447 | 3.24879E-12 | 48199 | 9.17 | 26.2 | 11 | 360  |
| Q9WU79 | Proline dehydrogenase 1, mitochondrial                                         | Prodh   | 0.448 | 0.000842218 | 74807 | 8.5  | 12.7 | 7  | 122  |
| O88986 | 2-amino-3-ketobutyrate coenzyme A ligase, mitochondrial                        | Gcat    | 0.451 | 0.006889167 | 49368 | 6.92 | 8.2  | 4  | 83   |
| Q9Z2Q5 | 39S ribosomal protein L40, mitochondrial                                       | Mrpl40  | 0.455 | 0.119688442 | 28754 | 9.49 | 12.1 | 2  | 61   |
| P50136 | 2-oxoisovalerate dehydrogenase subunit alpha, mitochondrial                    | Bckdha  | 0.457 | 5.30013E-10 | 54749 | 8.14 | 36   | 15 | 504  |
| Q9JHI5 | Isovaleryl-CoA dehydrogenase, mitochondrial                                    | Ivd     | 0.462 | 0           | 52653 | 8.53 | 40.3 | 16 | 1127 |
| Q8BMS4 | Ubiquinone biosynthesis O-methyltransferase, mitochondrial                     | Coq3    | 0.468 | 1.33186E-08 | 45741 | 8.07 | 23.8 | 7  | 366  |
| P16332 | Methylmalonyl-CoA mutase, mitochondrial                                        | Mut     | 0.468 | 2.22045E-16 | 94477 | 6.45 | 22.5 | 15 | 444  |
| Q3TC72 | Fumarylacetoacetate hydrolase domain-containing protein 2A                     | Usp17la | 0.469 | 0.052281317 | 39650 | 8.42 | 8    | 2  | 84   |
| P52196 | Thiosulfate sulfurtransferase                                                  | Tst     | 0.47  | 0.000190003 | 37110 | 7.71 | 27.6 | 8  | 171  |
| Q3UQ84 | Threonine--tRNA ligase, mitochondrial                                          | Tars2   | 0.477 | 1.09309E-07 | 88175 | 8.07 | 10.1 | 8  | 176  |
| Q9R112 | Sulfide:quinone oxidoreductase, mitochondrial                                  | Sqor    | 0.477 | 4.86362E-05 | 58268 | 9.2  | 24.2 | 9  | 283  |
| Q8VCW8 | Acyl-CoA synthetase family member 2, mitochondrial                             | Acsf2   | 0.479 | 3.24446E-07 | 77070 | 8.44 | 15.1 | 10 | 216  |
| Q99JY0 | Trifunctional enzyme subunit beta, mitochondrial                               | Hadhb   | 0.479 | 3.2489E-12  | 59430 | 9.43 | 67.2 | 25 | 2789 |
| P03899 | NADH-ubiquinone oxidoreductase chain 3                                         | mt-Nd3  | 0.479 | 0.988874922 | 14413 | 4.71 | 18.3 | 2  | 86   |
| Q9JK42 | [Pyruvate dehydrogenase (acetyl-transferring)] kinase isozyme 2, mitochondrial | Pdk2    | 0.486 | 0.000788931 | 51052 | 6.13 | 10.8 | 5  | 110  |
| Q9CYW4 | Haloacid dehalogenase-like hydrolase domain-containing protein 3               | Hdhd3   | 0.487 | 0.087874456 | 30529 | 6.31 | 10.8 | 2  | 46   |
| Q8BMS1 | Trifunctional enzyme subunit alpha, mitochondrial                              | Hadha   | 0.488 | 1.11022E-16 | 98656 | 9.24 | 63.2 | 37 | 4218 |
| P38060 | Hydroxymethylglutaryl-CoA lyase, mitochondrial                                 | Hmgcl   | 0.495 | 9.83246E-06 | 39714 | 8.7  | 26.8 | 7  | 349  |
| Q9CR13 | UPF0562 protein C7orf55 homolog                                                | Fmc1    | 0.504 |             | 13947 | 10.1 | 13.3 | 1  | 131  |
| Q8BWT1 | 3-ketoacyl-CoA thiolase, mitochondrial                                         | Acaa2   | 0.504 | 3.2489E-12  | 47989 | 8.33 | 72.8 | 23 | 3579 |

|        |                                                                                |         |       |             |       |       |      |    |      |
|--------|--------------------------------------------------------------------------------|---------|-------|-------------|-------|-------|------|----|------|
| B7ZMP1 | Probable Xaa-Pro aminopeptidase 3                                              | Xpnpep3 | 0.51  | 0.21546255  | 63685 | 7.6   | 3.8  | 2  | 67   |
| Q9WTP7 | GTP:AMP phosphotransferase AK3, mitochondrial                                  | Ak3     | 0.513 | 4.00791E-14 | 29592 | 8.87  | 58.1 | 11 | 609  |
| Q3TUH1 | Phosphatidate cytidyltransferase, mitochondrial                                | Tamm41  | 0.515 | 0.0387144   | 43016 | 9.07  | 6.8  | 2  | 82   |
| P26443 | Glutamate dehydrogenase 1, mitochondrial                                       | Glud1   | 0.519 | 9.62174E-11 | 69661 | 8.05  | 36.9 | 19 | 925  |
| P50171 | Estradiol 17-beta-dehydrogenase 8                                              | H2-Ke6  | 0.525 | 0.005952734 | 28862 | 6.1   | 39.8 | 7  | 353  |
| O70571 | [Pyruvate dehydrogenase (acetyl-transferring)] kinase isozyme 4, mitochondrial | Gramd1c | 0.526 | 3.01468E-05 | 52179 | 6.61  | 18   | 7  | 175  |
| O09174 | Alpha-methylacyl-CoA racemase                                                  | Amacr   | 0.534 | 1.40515E-06 | 46603 | 7.01  | 23.4 | 8  | 327  |
| Q91YY4 | ATP synthase mitochondrial F1 complex assembly factor 2                        | Atpaf2  | 0.536 | 0.001168485 | 36647 | 5.94  | 7.6  | 2  | 67   |
| Q8VE95 | UPF0598 protein C8orf82 homolog                                                | UPF0598 | 0.537 | 0.00789396  | 25573 | 9     | 24.8 | 4  | 101  |
| Q6PE15 | Mycophenolic acid acyl-glucuronide esterase, mitochondrial                     | Abhd10  | 0.54  | 0.302968485 | 38002 | 9.01  | 11.1 | 4  | 74   |
| Q9DBL1 | Short/branched chain specific acyl-CoA dehydrogenase, mitochondrial            | Acadsb  | 0.541 | 7.61679E-07 | 55174 | 8     | 23.6 | 9  | 231  |
| P55096 | ATP-binding cassette sub-family D member 3                                     | Abcd3   | 0.541 | 5.23099E-06 | 85793 | 9.32  | 13.5 | 10 | 230  |
| P32020 | Non-specific lipid-transfer protein                                            | Scp2    | 0.551 | 1.61961E-06 | 70256 | 7.16  | 17.7 | 10 | 248  |
| O88696 | ATP-dependent Clp protease proteolytic subunit, mitochondrial                  | Clpp    | 0.552 | 0.000498087 | 32358 | 7.05  | 30.1 | 5  | 235  |
| Q9D8P4 | 39S ribosomal protein L17, mitochondrial                                       | Mrpl17  | 0.554 | 0.126501375 | 22585 | 9.83  | 9.7  | 2  | 49   |
| P42925 | Peroxisomal membrane protein 2                                                 | Pxmp2   | 0.554 | 0.008563875 | 24772 | 10.08 | 5.2  | 1  | 55   |
| Q9CZS1 | Aldehyde dehydrogenase X, mitochondrial                                        | Aldh1b1 | 0.556 | 1.54412E-05 | 65420 | 6.59  | 16.6 | 8  | 136  |
| P29758 | Ornithine aminotransferase, mitochondrial                                      | Oat     | 0.557 | 3.34269E-08 | 54910 | 6.19  | 16.9 | 7  | 293  |
| Q07417 | Short-chain specific acyl-CoA dehydrogenase, mitochondrial                     | Acads   | 0.558 | 3.24885E-12 | 50188 | 8.68  | 55.8 | 16 | 1567 |
| Q9DCM0 | Persulfide dioxygenase ETHE1, mitochondrial                                    | Ethe1   | 0.564 | 0.023353445 | 30068 | 6.78  | 20.9 | 5  | 100  |
| Q91ZE0 | Trimethyllysine dioxygenase, mitochondrial                                     | Tmlhe   | 0.565 | 0.329863199 | 55705 | 8.51  | 8.6  | 3  | 50   |
| Q9CYK1 | Tryptophan--tRNA ligase, mitochondrial                                         | Wars2   | 0.565 | 0.074639046 | 47689 | 8.94  | 5.3  | 2  | 41   |
| Q9CQZ5 | NADH dehydrogenase [ubiquinone] 1 alpha subcomplex subunit 6                   | Ndufa6  | 0.565 | 4.72108E-06 | 18023 | 10.1  | 46.6 | 9  | 411  |
| Q91YP0 | L-2-hydroxyglutarate dehydrogenase, mitochondrial                              | L2hgdh  | 0.567 | 0.021800592 | 57738 | 8.59  | 17.5 | 9  | 170  |

|        |                                                                                                            |         |       |             |       |       |      |    |      |
|--------|------------------------------------------------------------------------------------------------------------|---------|-------|-------------|-------|-------|------|----|------|
| Q60759 | Glutaryl-CoA dehydrogenase, mitochondrial                                                                  | Gcdh    | 0.578 | 6.43611E-07 | 53213 | 8.98  | 10.5 | 6  | 100  |
| Q91V16 | LYR motif-containing protein 5                                                                             | Etfrf1  | 0.579 | 0.096090755 | 13364 | 9.73  | 18.6 | 2  | 30   |
| Q8BWF0 | Succinate-semialdehyde dehydrogenase, mitochondrial                                                        | Aldh5a1 | 0.584 | 0.000666277 | 64065 | 8.53  | 21   | 10 | 254  |
| P03888 | NADH-ubiquinone oxidoreductase chain 1                                                                     | mt-Nd1  | 0.587 | 0.00016967  | 37696 | 6.42  | 8.8  | 3  | 107  |
| P48410 | ATP-binding cassette sub-family D member 1                                                                 | Abcd1   | 0.59  | 0.002762308 | 88966 | 8.9   | 8.3  | 6  | 85   |
| Q9CXZ1 | NADH dehydrogenase [ubiquinone] iron-sulfur protein 4, mitochondrial                                       | Ndufs4  | 0.591 | 2.69329E-12 | 23725 | 10    | 40.6 | 7  | 538  |
| Q8R2Q4 | Ribosome-releasing factor 2, mitochondrial                                                                 | Gfm2    | 0.592 | 0.005989032 | 96019 | 6.01  | 7.7  | 5  | 187  |
| Q80XL6 | Acyl-CoA dehydrogenase family member 11                                                                    | Acad11  | 0.596 | 9.58029E-07 | 98135 | 8.67  | 17.5 | 13 | 293  |
| Q9D0D3 | Poly(A) RNA polymerase, mitochondrial                                                                      | Mtpap   | 0.596 | 0.048029861 | 74924 | 9.1   | 2.6  | 2  | 43   |
| Q8C7H1 | Methylmalonic aciduria type A homolog, mitochondrial                                                       | Mmaa    | 0.602 | 0.001976058 | 50943 | 9.45  | 18.3 | 7  | 124  |
| Q99L13 | 3-hydroxyisobutyrate dehydrogenase, mitochondrial                                                          | Hibadh  | 0.603 | 6.07493E-05 | 40857 | 8.37  | 30.4 | 7  | 544  |
| P45952 | Medium-chain specific acyl-CoA dehydrogenase, mitochondrial                                                | Acadm   | 0.605 | 3.24879E-12 | 54012 | 8.6   | 58.4 | 22 | 1660 |
| Q3TLP5 | Enoyl-CoA hydratase domain-containing protein 2, mitochondrial                                             | Echdc2  | 0.607 | 0.044900077 | 34007 | 9.03  | 18.9 | 5  | 200  |
| Q921S7 | 39S ribosomal protein L37, mitochondrial                                                                   | Mrpl37  | 0.608 | 2.98098E-05 | 54210 | 9     | 25.8 | 9  | 232  |
| Q9DAT5 | Mitochondrial tRNA-specific 2-thiouridylase 1                                                              | Trmu    | 0.609 | 2.5581E-05  | 54426 | 8.67  | 10.8 | 3  | 152  |
| Q9CQ75 | NADH dehydrogenase [ubiquinone] 1 alpha subcomplex subunit 2                                               | Ndufa2  | 0.61  | 7.39376E-06 | 12627 | 10.02 | 63.6 | 8  | 418  |
| Q9D404 | 3-oxoacyl-[acyl-carrier-protein] synthase, mitochondrial                                                   | Oxsm    | 0.617 | 0.000175797 | 53807 | 6.6   | 15.3 | 6  | 169  |
| Q91VT4 | Carbonyl reductase family member 4                                                                         | Cbr4    | 0.619 | 8.19887E-05 | 29465 | 9.71  | 37.7 | 7  | 391  |
| Q9CQL5 | 39S ribosomal protein L18, mitochondrial                                                                   | Mrpl18  | 0.619 | 0.005508025 | 23011 | 9.43  | 18.9 | 3  | 127  |
| P53395 | Lipoamide acyltransferase component of branched-chain alpha-keto acid dehydrogenase complex, mitochondrial | Dbt     | 0.619 | 8.72427E-10 | 62034 | 8.78  | 31.3 | 15 | 331  |
| O35855 | Branched-chain-amino-acid aminotransferase, mitochondrial                                                  | Bcat2   | 0.619 | 1.46882E-07 | 49481 | 8.61  | 23.2 | 8  | 342  |
| Q9CQN7 | 39S ribosomal protein L41, mitochondrial                                                                   | Mrpl41  | 0.62  | 0.003641617 | 18919 | 9.82  | 40   | 5  | 155  |
| Q9DCA2 | 28S ribosomal protein S11, mitochondrial                                                                   | Mrps11  | 0.621 | 2.12289E-05 | 22830 | 10.77 | 13.1 | 3  | 87   |

|        |                                                                             |          |       |             |       |       |      |    |      |
|--------|-----------------------------------------------------------------------------|----------|-------|-------------|-------|-------|------|----|------|
| P09671 | Superoxide dismutase [Mn], mitochondrial                                    | Sod2     | 0.622 | 3.2489E-12  | 28711 | 8.8   | 33.3 | 8  | 1181 |
| Q8JZS9 | 39S ribosomal protein L48, mitochondrial                                    | Mrpl48   | 0.622 | 0.003843566 | 27890 | 9.45  | 13.7 | 3  | 55   |
| Q9CQ06 | 39S ribosomal protein L24, mitochondrial                                    | Mrpl24   | 0.624 | 0.095133363 | 28423 | 9.51  | 11.1 | 3  | 73   |
| P56501 | Mitochondrial uncoupling protein 3                                          | Ucp3     | 0.625 | 0.009212928 | 37725 | 9.61  | 14   | 4  | 83   |
| Q60936 | Atypical kinase ADCK3, mitochondrial                                        | Coq8a    | 0.628 | 3.3481E-12  | 80633 | 6.1   | 23.7 | 13 | 812  |
| Q6NVE9 | Protein phosphatase PTC7 homolog                                            | Pptc7    | 0.629 | 0.117665057 | 35947 | 5.08  | 20.6 | 5  | 227  |
| P08074 | Carbonyl reductase [NADPH] 2                                                | Cbr2     | 0.631 | 1.0647E-06  | 29722 | 9.1   | 21.7 | 4  | 170  |
| O08756 | 3-hydroxyacyl-CoA dehydrogenase type-2                                      | Hsd17b10 | 0.633 | 1.94825E-08 | 30724 | 8.53  | 43.7 | 9  | 740  |
| O88844 | Isocitrate dehydrogenase [NADP] cytoplasmic                                 | Idh1     | 0.634 | 2.52691E-06 | 55981 | 6.73  | 15.9 | 6  | 157  |
| Q8R0N6 | Hydroxyacid-oxoacid transhydrogenase, mitochondrial                         | Adhfe1   | 0.636 | 1.34864E-08 | 56320 | 7.25  | 15.3 | 6  | 337  |
| Q9CR21 | Acyl carrier protein, mitochondrial                                         | Ndufab1  | 0.636 | 0.000412077 | 19707 | 5.08  | 19.2 | 3  | 90   |
| Q9CXT8 | Mitochondrial-processing peptidase subunit beta                             | Pmpcb    | 0.638 | 0.000856349 | 59732 | 6.55  | 18.6 | 9  | 242  |
| Q5SSK3 | Transcription elongation factor, mitochondrial                              | Tefm     | 0.638 | 0.361703871 | 49121 | 9.56  | 8.5  | 3  | 71   |
| Q9D0K2 | Succinyl-CoA:3-ketoacid coenzyme A transferase 1, mitochondrial             | Oxct1    | 0.639 | 3.24901E-12 | 65748 | 8.73  | 29.6 | 12 | 1635 |
| Q9D051 | Pyruvate dehydrogenase E1 component subunit beta, mitochondrial             | Pdhb     | 0.642 | 3.24896E-12 | 43837 | 6.41  | 46   | 14 | 1598 |
| Q99NB1 | Acetyl-coenzyme A synthetase 2-like, mitochondrial                          | Acss1    | 0.644 | 3.07796E-09 | 81963 | 6.51  | 26.7 | 15 | 405  |
| Q3UV70 | [Pyruvate dehydrogenase [acetyl-transferring]]-phosphatase 1, mitochondrial | Pdp1     | 0.646 | 0.010602808 | 66983 | 6.2   | 3.5  | 2  | 54   |
| Q9CQZ6 | NADH dehydrogenase [ubiquinone] 1 beta subcomplex subunit 3                 | Ndufb3   | 0.647 | 1.96349E-09 | 13747 | 9.01  | 17.3 | 2  | 95   |
| Q9CQ62 | 2,4-dienoyl-CoA reductase, mitochondrial                                    | Decr1    | 0.649 | 5.86875E-10 | 42205 | 9.1   | 40.9 | 12 | 801  |
| Q9Z1P6 | NADH dehydrogenase [ubiquinone] 1 alpha subcomplex subunit 7                | Ndufa7   | 0.651 | 9.99484E-12 | 15375 | 10.17 | 60.2 | 8  | 654  |
| Q9WVL0 | Maleylacetoacetate isomerase                                                | Gstz1    | 0.651 | 0.016035016 | 27410 | 7.68  | 34.7 | 6  | 195  |
| Q9D0Q7 | 39S ribosomal protein L45, mitochondrial                                    | Mrpl45   | 0.652 | 0.645637897 | 40658 | 9.3   | 11.4 | 4  | 84   |
| Q8BK30 | NADH dehydrogenase [ubiquinone] flavoprotein 3,                             | Ndufv3   | 0.653 | 3.46671E-05 | 13869 | 9.34  | 21.2 | 2  | 152  |

|        |                                                                                |        |       |             |        |      |      |    |      |
|--------|--------------------------------------------------------------------------------|--------|-------|-------------|--------|------|------|----|------|
|        | mitochondrial                                                                  |        |       |             |        |      |      |    |      |
| Q9DCM2 | Glutathione S-transferase kappa 1                                              | Gstk1  | 0.654 | 2.08935E-10 | 29697  | 8.97 | 48.2 | 10 | 404  |
| P51174 | Long-chain specific acyl-CoA dehydrogenase, mitochondrial                      | Acadl  | 0.654 | 3.24885E-12 | 54922  | 8.53 | 45.3 | 19 | 3049 |
| P58064 | 28S ribosomal protein S6, mitochondrial                                        | Mrps6  | 0.656 | 0.002742536 | 16419  | 9.51 | 29.6 | 4  | 72   |
| Q9CQ40 | 39S ribosomal protein L49, mitochondrial                                       | Mrpl49 | 0.656 | 1.50613E-05 | 21928  | 9.52 | 19.9 | 3  | 125  |
| Q9QYR9 | Acyl-coenzyme A thioesterase 2, mitochondrial                                  | Acot2  | 0.659 | 6.293E-07   | 54437  | 6.88 | 43.5 | 15 | 666  |
| Q8QZT1 | Acetyl-CoA acetyltransferase, mitochondrial                                    | Acat1  | 0.659 | 0           | 52463  | 8.71 | 45.5 | 17 | 2468 |
| Q99J99 | 3-mercaptopyruvate sulfurtransferase                                           | Mpst   | 0.66  | 0.012137747 | 36439  | 6.11 | 14.5 | 4  | 233  |
| Q9JL8  | Serine--tRNA ligase, mitochondrial                                             | Sars2  | 0.664 | 0.036774297 | 62460  | 8.03 | 7.5  | 3  | 95   |
| P35486 | Pyruvate dehydrogenase E1 component subunit alpha, somatic form, mitochondrial | Pdha1  | 0.667 | 0           | 49388  | 8.49 | 40.3 | 18 | 1475 |
| P03921 | NADH-ubiquinone oxidoreductase chain 5                                         | mt-Nd5 | 0.669 | 0.144453636 | 74271  | 9.15 | 4.6  | 2  | 183  |
| Q8VEA4 | Mitochondrial intermembrane space import and assembly protein 40               | Chchd4 | 1.523 | 0.05398594  | 17977  | 4.22 | 25.9 | 2  | 38   |
| P28661 | Septin-4                                                                       | 42982  | 1.533 | 0.060860661 | 62691  | 5.58 | 5    | 3  | 56   |
| Q62167 | ATP-dependent RNA helicase DDX3X                                               | Ddx3x  | 1.556 | 0.000162664 | 81018  | 6.73 | 18   | 11 | 231  |
| Q6ZWQ0 | Nesprin-2                                                                      | Syne2  | 1.65  | 0.194705577 | 904870 | 5.23 | 0.4  | 3  | 65   |
| O55142 | 60S ribosomal protein L35a                                                     | Cfl2   | 1.662 | 0.000726222 | 15410  | 10.9 | 22.7 | 3  | 135  |
| Q8BX02 | KN motif and ankyrin repeat domain-containing protein 2                        | Kank2  | 1.667 | 0.059299434 | 97175  | 5.38 | 4.6  | 4  | 71   |
| Q8BX10 | Serine/threonine-protein phosphatase PGAM5, mitochondrial                      | Pgam5  | 1.831 | 0.028691612 | 34896  | 9.15 | 7.6  | 2  | 31   |
| P28352 | DNA-(apurinic or apyrimidinic site) lyase                                      | Apex1  | 2.572 | 0.022208945 | 42971  | 8.04 | 11.4 | 3  | 52   |
